# Supplementary material for: Limosilactobacillus balticus sp. nov., Limosilactobacillus agrestis sp. nov., Limosilactobacillus albertensis sp. nov., Limosilactobacillus rudii sp. nov. and Limosilactobacillus fastidiosus sp. nov., five novel Limosilactobacillus species isolated from the vertebrate gastrointestinal tract, and proposal of six subspecies of Limosilactobacillus reuteri adapted to the gastrointestinal tract of specific vertebrate hosts
Source: PubMed Central journal article supplement (PMC8346765; doi:10.1099/ijsem.0.004644), 2021-02-03
Supplement: ijsem-71-644-s001.pdf [file ijsem-71-644-s001.pdf]

## Supplementary Information

**Description of *Limosilactobacillus balticus* sp. nov., *Limosilactobacillus agrestis* sp. nov., *Limosilactobacillus albertensis* sp. nov., *Limosilactobacillus rudii* sp. nov., *Limosilactobacillus fastidiosus* sp. nov., five novel *Limosilactobacillus* species isolated from the vertebrate gastrointestinal tract, and proposal of six subspecies of *Limosilactobacillus reuteri* adapted to the gastrointestinal tract of specific vertebrate hosts**

Fuyong Li, Christopher C. Cheng, Jinshui Zheng, Junhong Liu, Rodrigo Margain Quevedo, Junjie Li, Stefan Roos, Michael G. Gänzle, Jens Walter

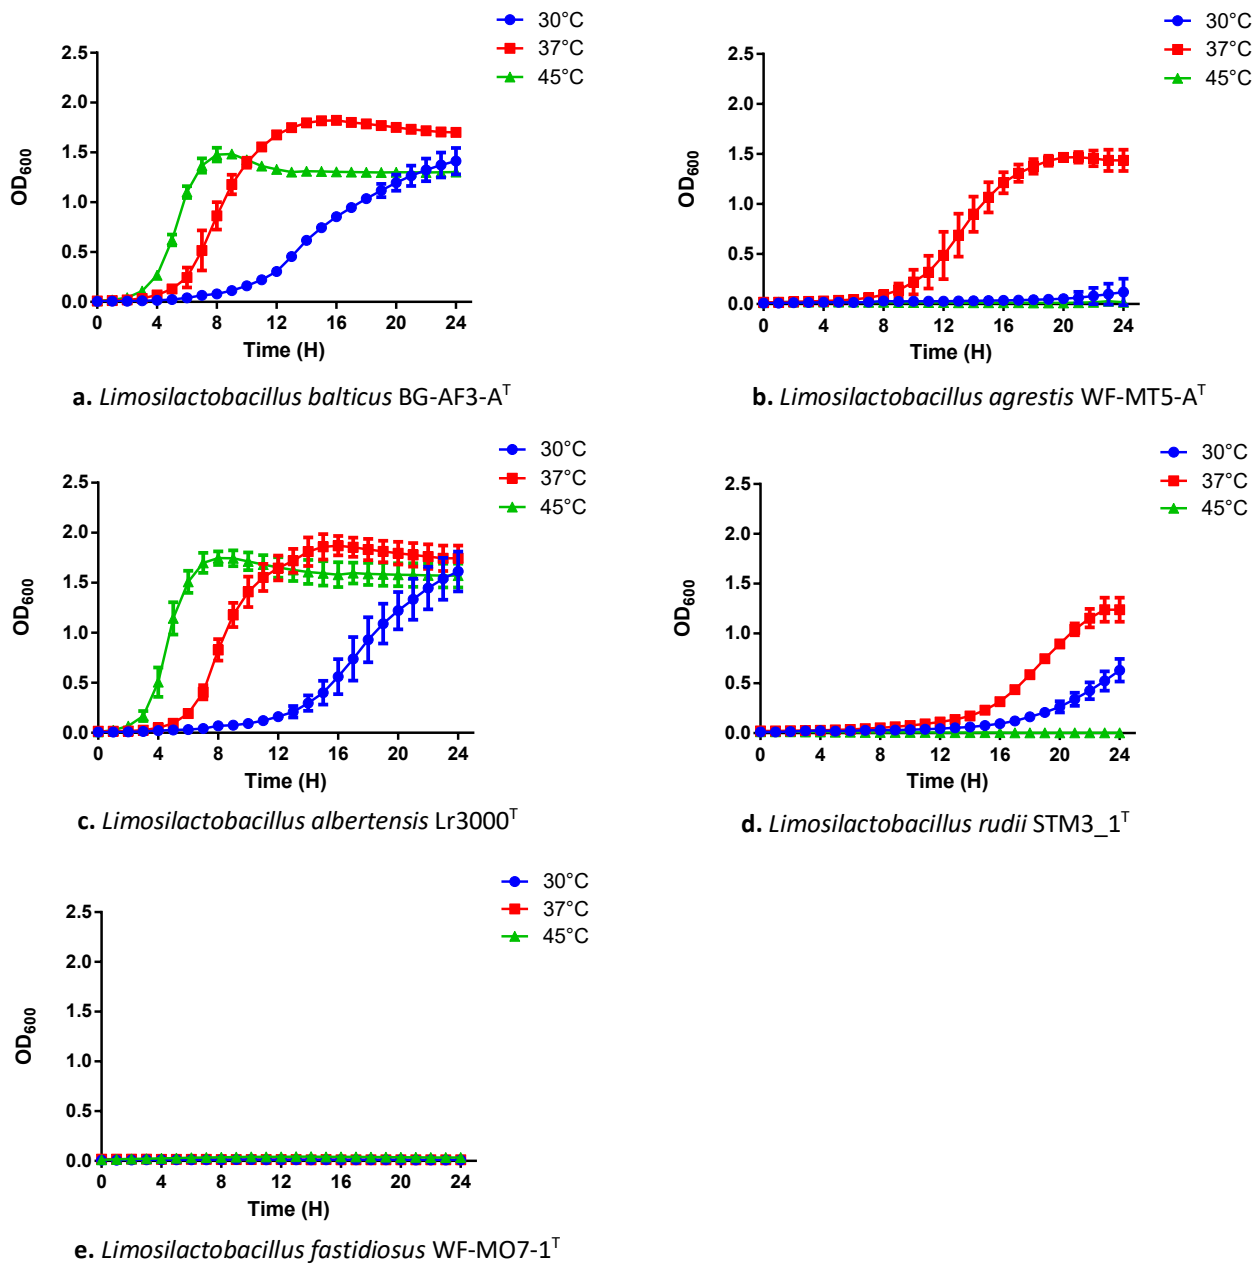

**Fig S1.** Growth curves of *Limosilactobacillus balticus* BG-AF3-A<sup>T</sup> (a), *Limosilactobacillus agrestis* WF-MT5-A<sup>T</sup> (b), *Limosilactobacillus albertensis* Lr3000<sup>T</sup> (c), *Limosilactobacillus rudii* STM3\_1<sup>T</sup> (d), and *Limosilactobacillus fastidiosus* WF-MO7-1<sup>T</sup> (e). Five putative type strains were incubated anaerobically in MRS broth (in the 96-well microplate; each well was overlaid with parafilm to keep the oxygen out) at 15, 30, 37 and 45 °C, and OD<sub>600</sub> was measured hourly using SpectraMax M3 Multi-Mode Microplate Readers (Molecular Devices, San Jose, CA, USA) for 24 hours. None of the strains grew at 15 °C.

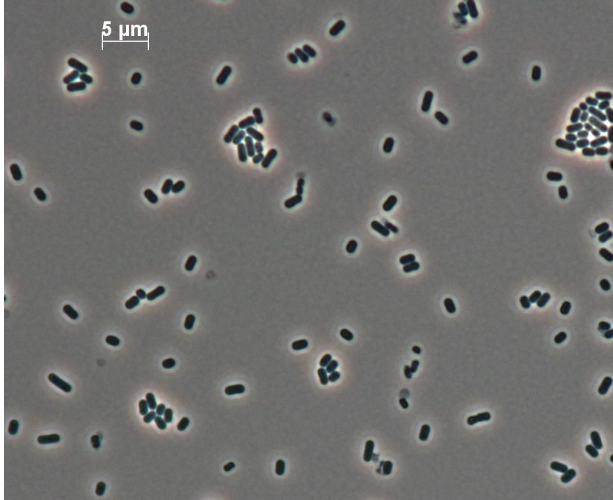

a. *Limosilactobacillus balticus* BG-AF3-A<sup>T</sup>

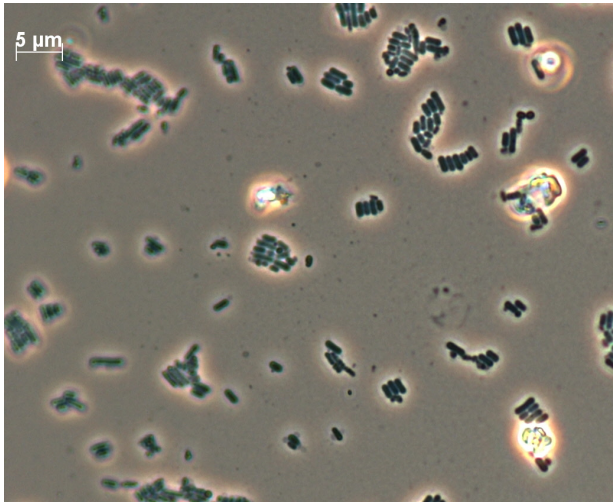

b. *Limosilactobacillus agrestis* WF-MT5-A<sup>T</sup>

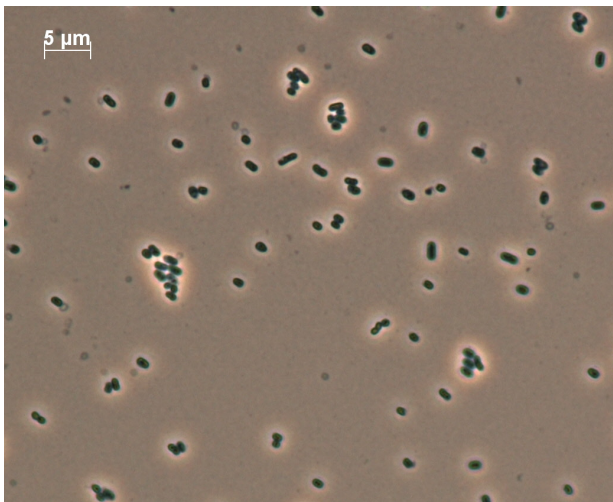

c. *Limosilactobacillus albertensis* Lr3000<sup>T</sup>

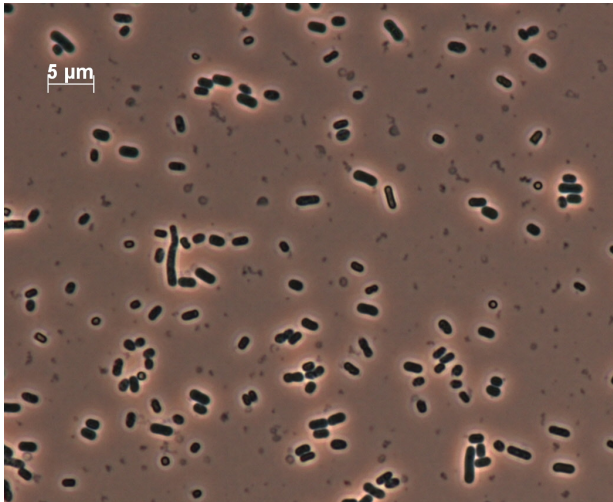

d. *Limosilactobacillus rudii* STM3\_1<sup>T</sup>

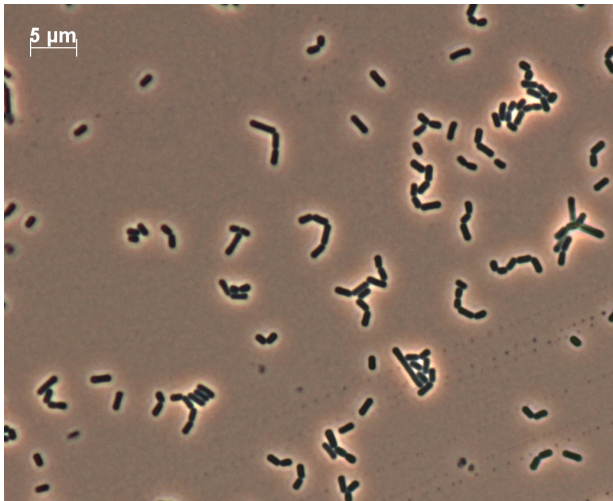

e. *Limosilactobacillus fastidiosus* WF-MO7-1<sup>T</sup>

**Fig S2.** Cell morphology of *Limosilactobacillus balticus* BG-AF3-A<sup>T</sup> (a), *Limosilactobacillus agrestis* WF-MT5-A<sup>T</sup> (b), *Limosilactobacillus albertensis* Lr3000<sup>T</sup> (c), *Limosilactobacillus rudii* STM3\_1<sup>T</sup> (d), and *Limosilactobacillus fastidiosus* WF-MO7-1<sup>T</sup> (e). Cells of five putative type strains were grown on MRS agar plates for 24 - 48 hours at 28 °C under anaerobic conditions, and then were imaged with the ZEISS Scope-A1 microscope, which was carried out by the Identification Service of the DSMZ (Braunschweig, Germany).

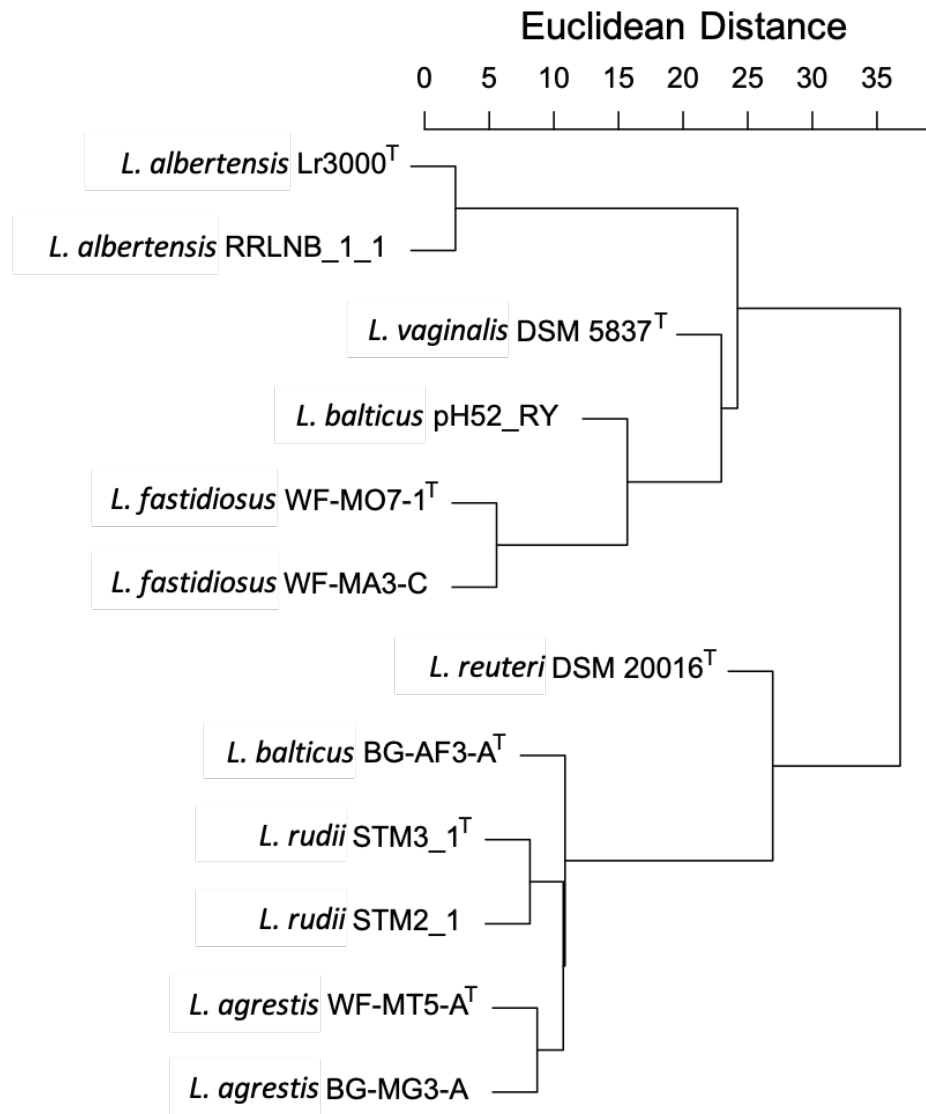

**Fig S3.** Cluster analysis of fatty acid compositions showing strains of *Limosilactobacillus* belonging the same novel species were generally more similar with each other, compared to strains from other novel species. Cluster analysis was conducted with Average clustering and Euclidean distance.

**Table S1.** *Limosilactobacillus reuteri* genomes used in this study

| Strain     | Origin    | Lineage | Subspecies                                                | Genome Accession Number  |
|------------|-----------|---------|-----------------------------------------------------------|--------------------------|
| TD1        | Rat       | I       | <i>Limosilactobacillus reuteri</i> ssp. <i>murium</i>     | GenBank: GCA_000439275.1 |
| I49        | Mouse     | I       | <i>Limosilactobacillus reuteri</i> ssp. <i>murium</i>     | JGI: 2718217763          |
| LR0        | Mouse     | I       | <i>Limosilactobacillus reuteri</i> ssp. <i>murium</i>     | GenBank: GCA_002156605.1 |
| LTH5448    | Sourdough | I       | <i>Limosilactobacillus reuteri</i> ssp. <i>murium</i>     | JGI: 2571042361          |
| lpuph1     | Mouse     | I       | <i>Limosilactobacillus reuteri</i> ssp. <i>murium</i>     | JGI: 2506381017          |
| MM4-1a     | Human     | II      | <i>Limosilactobacillus reuteri</i> ssp. <i>reuteri</i>    | JGI: 2502171170          |
| IRT        | Human     | II      | <i>Limosilactobacillus reuteri</i> ssp. <i>reuteri</i>    | JGI: 2636415954          |
| JCM 1112   | Human     | II      | <i>Limosilactobacillus reuteri</i> ssp. <i>reuteri</i>    | GenBank: GCA_000010005.1 |
| DSM 20016  | Human     | II      | <i>Limosilactobacillus reuteri</i> ssp. <i>reuteri</i>    | GenBank: GCA_000016825.1 |
| MM2-3      | Human     | II      | <i>Limosilactobacillus reuteri</i> ssp. <i>reuteri</i>    | JGI: 2502171171          |
| LR17       | Horse     | II      | <i>Limosilactobacillus reuteri</i> ssp. <i>reuteri</i>    | GenBank: GCA_003174915.1 |
| LR10       | Cow       | II      | <i>Limosilactobacillus reuteri</i> ssp. <i>reuteri</i>    | GenBank: GCA_003175075.1 |
| LR2        | Goat      | II      | <i>Limosilactobacillus reuteri</i> ssp. <i>reuteri</i>    | GenBank: GCA_003175015.1 |
| LR8        | Sheep     | II      | <i>Limosilactobacillus reuteri</i> ssp. <i>reuteri</i>    | GenBank: GCA_003174875.1 |
| LR19       | Horse     | II      | <i>Limosilactobacillus reuteri</i> ssp. <i>reuteri</i>    | GenBank: GCA_003175025.1 |
| mlc3       | Mouse     | III     | <i>Limosilactobacillus reuteri</i> ssp. <i>rodentium</i>  | JGI: 2506381016          |
| R2lc       | Rat       | III     | <i>Limosilactobacillus reuteri</i> ssp. <i>rodentium</i>  | GenBank: GCA_003703875.1 |
| 111b       | Mouse     | III     | <i>Limosilactobacillus reuteri</i> ssp. <i>rodentium</i>  | GenBank: GCA_002253965.1 |
| TMW1.656   | Sourdough | III     | <i>Limosilactobacillus reuteri</i> ssp. <i>rodentium</i>  | GenBank: GCA_000712565.2 |
| 100-23     | Rat       | III     | <i>Limosilactobacillus reuteri</i> ssp. <i>rodentium</i>  | GenBank: GCA_000168255.1 |
| I5007      | Pig       | IV      | <i>Limosilactobacillus reuteri</i> ssp. <i>suis</i>       | GenBank: GCA_000410995.1 |
| lp167-67   | Pig       | IV      | <i>Limosilactobacillus reuteri</i> ssp. <i>suis</i>       | JGI: 2599185361          |
| ZLR003     | Pig       | IV      | <i>Limosilactobacillus reuteri</i> ssp. <i>suis</i>       | JGI: 2687453552          |
| pg-3b      | Pig       | IV      | <i>Limosilactobacillus reuteri</i> ssp. <i>suis</i>       | JGI: 2599185334          |
| ATCC 53608 | Pig       | IV      | <i>Limosilactobacillus reuteri</i> ssp. <i>suis</i>       | GenBank: GCA_000236455.2 |
| 3c6        | Pig       | V       | <i>Limosilactobacillus reuteri</i> ssp. <i>porcinus</i>   | JGI: 2599185333          |
| 20-2       | Pig       | V       | <i>Limosilactobacillus reuteri</i> ssp. <i>porcinus</i>   | JGI: 2599185332          |
| SD2112     | Human     | VI      | <i>Limosilactobacillus reuteri</i> ssp. <i>kinnaridis</i> | GenBank: GCA_000159455.2 |
| CF48-3A    | Human     | VI      | <i>Limosilactobacillus reuteri</i> ssp. <i>kinnaridis</i> | JGI: 2502171173          |
| M27U15     | Human     | VI      | <i>Limosilactobacillus reuteri</i> ssp. <i>kinnaridis</i> | JGI: 2687453659          |
| JCM1081    | Chicken   | VI      | <i>Limosilactobacillus reuteri</i> ssp. <i>kinnaridis</i> | JGI: 2684623011          |
| CSF8       | Chicken   | VI      | <i>Limosilactobacillus reuteri</i> ssp. <i>kinnaridis</i> | JGI: 2684623009          |
| AP3        | Pheasant  | VI      | <i>Limosilactobacillus reuteri</i> ssp. <i>kinnaridis</i> | GenBank: GCA_014145445.1 |
